# Supplementary material
Source: Springer Nature journal article supplement (https://www.springermedizin.de/resource/supplementary/12943_2013_1118_MOESM4_ESM.pdf/9552542)

**A**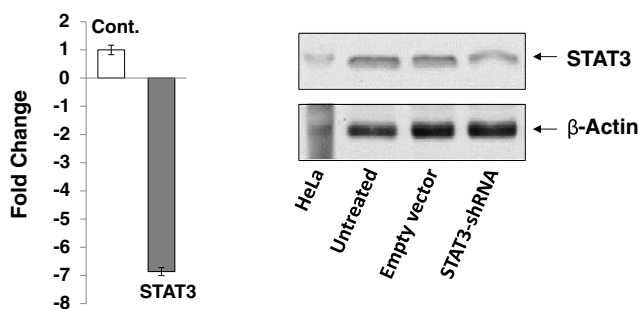**B**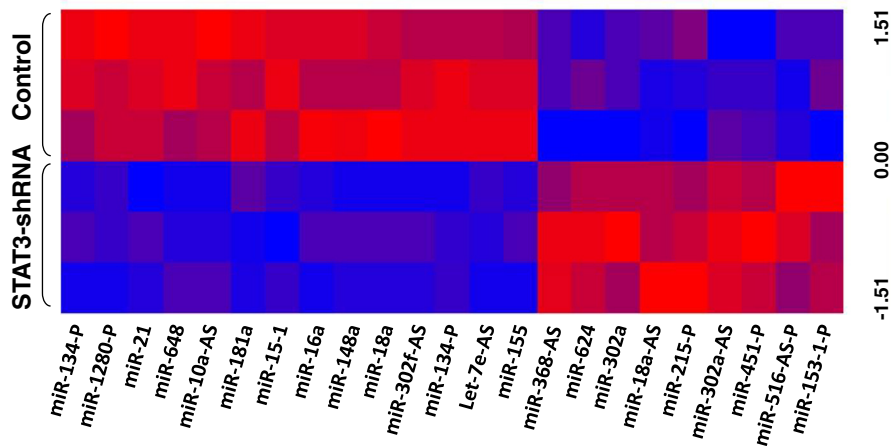**C**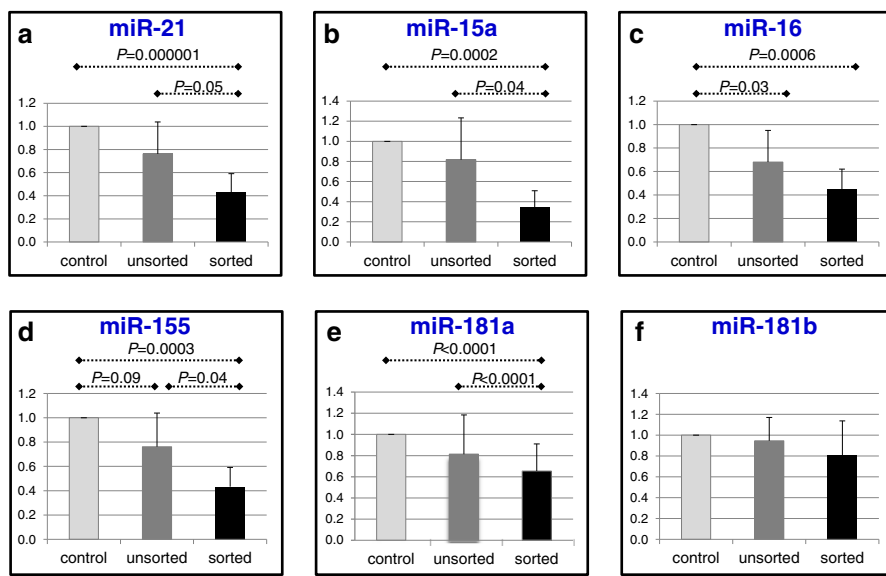

Supplement: MOESM4 [file 9552542]
